# Supplementary material for: Cumulative pre-cooling methods do not enhance cycling performance in tropical climate
Source: PLoS One. 2023 Oct 12;18(10):e0291951. doi: 10.1371/journal.pone.0291951 (PMC10569554; doi:10.1371/journal.pone.0291951)
Supplement: S1 Data — (XLSX) [file pone.0291951.s001.xlsx]

## Sheet: distance travelled_performance
	cycling performance
ID	time	distance traveled per 2-min block (m)	condition
1	2	1352	NO-VEST
1	4	1410	NO-VEST
1	6	1364	NO-VEST
1	8	1332	NO-VEST
1	10	1362	NO-VEST
1	12	1372	NO-VEST
1	14	1382	NO-VEST
1	16	1112	NO-VEST
1	18	1362	NO-VEST
1	20	1402	NO-VEST
1	2	1279	ICE-VEST
1	4	1322	ICE-VEST
1	6	1282	ICE-VEST
1	8	1242	ICE-VEST
1	10	1282	ICE-VEST
1	12	1292	ICE-VEST
1	14	1279	ICE-VEST
1	16	1262	ICE-VEST
1	18	1322	ICE-VEST
1	20	1402	ICE-VEST
1	2	1259	MEN-VEST
1	4	1312	MEN-VEST
1	6	1242	MEN-VEST
1	8	1272	MEN-VEST
1	10	1272	MEN-VEST
1	12	1302	MEN-VEST
1	14	1229	MEN-VEST
1	16	1272	MEN-VEST
1	18	1262	MEN-VEST
1	20	1272	MEN-VEST
2	2	1372	NO-VEST
2	4	1372	NO-VEST
2	6	1362	NO-VEST
2	8	1292	NO-VEST
2	10	1312	NO-VEST
2	12	1302	NO-VEST
2	14	1279	NO-VEST
2	16	1252	NO-VEST
2	18	1262	NO-VEST
2	20	1352	NO-VEST
2	2	1352	ICE-VEST
2	4	1382	ICE-VEST
2	6	1452	ICE-VEST
2	8	1392	ICE-VEST
2	10	1455	ICE-VEST
2	12	1412	ICE-VEST
2	14	1412	ICE-VEST
2	16	1460	ICE-VEST
2	18	1437	ICE-VEST
2	20	1432	ICE-VEST
2	2	1332	MEN-VEST
2	4	1382	MEN-VEST
2	6	1382	MEN-VEST
2	8	1362	MEN-VEST
2	10	1352	MEN-VEST
2	12	1312	MEN-VEST
2	14	1312	MEN-VEST
2	16	1352	MEN-VEST
2	18	1332	MEN-VEST
2	20	1362	MEN-VEST
3	2	1392	NO-VEST
3	4	1452	NO-VEST
3	6	1362	NO-VEST
3	8	1352	NO-VEST
3	10	1412	NO-VEST
3	12	1435	NO-VEST
3	14	1392	NO-VEST
3	16	1362	NO-VEST
3	18	1332	NO-VEST
3	20	1322	NO-VEST
3	2	1199	ICE-VEST
3	4	1162	ICE-VEST
3	6	1249	ICE-VEST
3	8	1252	ICE-VEST
3	10	1109	ICE-VEST
3	12	1232	ICE-VEST
3	14	1069	ICE-VEST
3	16	1142	ICE-VEST
3	18	1099	ICE-VEST
3	20	1079	ICE-VEST
3	2	1289	MEN-VEST
3	4	1242	MEN-VEST
3	6	1262	MEN-VEST
3	8	1292	MEN-VEST
3	10	1312	MEN-VEST
3	12	1332	MEN-VEST
3	14	1302	MEN-VEST
3	16	1322	MEN-VEST
3	18	1269	MEN-VEST
3	20	1282	MEN-VEST
4	2	1382	NO-VEST
4	4	1382	NO-VEST
4	6	1332	NO-VEST
4	8	1342	NO-VEST
4	10	1322	NO-VEST
4	12	1312	NO-VEST
4	14	1322	NO-VEST
4	16	1362	NO-VEST
4	18	1342	NO-VEST
4	20	1382	NO-VEST
4	2	1372	ICE-VEST
4	4	1392	ICE-VEST
4	6	1302	ICE-VEST
4	8	1229	ICE-VEST
4	10	1202	ICE-VEST
4	12	1292	ICE-VEST
4	14	1292	ICE-VEST
4	16	1352	ICE-VEST
4	18	1312	ICE-VEST
4	20	1292	ICE-VEST
4	2	1332	MEN-VEST
4	4	1332	MEN-VEST
4	6	1362	MEN-VEST
4	8	1302	MEN-VEST
4	10	1269	MEN-VEST
4	12	1312	MEN-VEST
4	14	1282	MEN-VEST
4	16	1282	MEN-VEST
4	18	1282	MEN-VEST
4	20	1322	MEN-VEST
5	2	1342	NO-VEST
5	4	1259	NO-VEST
5	6	1272	NO-VEST
5	8	1242	NO-VEST
5	10	1252	NO-VEST
5	12	1239	NO-VEST
5	14	1192	NO-VEST
5	16	1089	NO-VEST
5	18	1089	NO-VEST
5	20	1262	NO-VEST
5	2	1289	ICE-VEST
5	4	1292	ICE-VEST
5	6	1272	ICE-VEST
5	8	1302	ICE-VEST
5	10	1272	ICE-VEST
5	12	1282	ICE-VEST
5	14	1292	ICE-VEST
5	16	1289	ICE-VEST
5	18	1272	ICE-VEST
5	20	1322	ICE-VEST
5	2	1332	MEN-VEST
5	4	1309	MEN-VEST
5	6	1321	MEN-VEST
5	8	1353	MEN-VEST
5	10	1202	MEN-VEST
5	12	1282	MEN-VEST
5	14	1352	MEN-VEST
5	16	1312	MEN-VEST
5	18	1312	MEN-VEST
5	20	1302	MEN-VEST
6	2	1332	NO-VEST
6	4	1382	NO-VEST
6	6	1372	NO-VEST
6	8	1352	NO-VEST
6	10	1342	NO-VEST
6	12	1312	NO-VEST
6	14	1282	NO-VEST
6	16	1282	NO-VEST
6	18	1319	NO-VEST
6	20	1327	NO-VEST
6	2	1299	ICE-VEST
6	4	1282	ICE-VEST
6	6	1332	ICE-VEST
6	8	1299	ICE-VEST
6	10	1249	ICE-VEST
6	12	1199	ICE-VEST
6	14	1199	ICE-VEST
6	16	1209	ICE-VEST
6	18	1239	ICE-VEST
6	20	1269	ICE-VEST
6	2		MEN-VEST
6	4		MEN-VEST
6	6		MEN-VEST
6	8		MEN-VEST
6	10		MEN-VEST
6	12		MEN-VEST
6	14		MEN-VEST
6	16		MEN-VEST
6	18		MEN-VEST
6	20		MEN-VEST
7	2	1335	NO-VEST
7	4	1286	NO-VEST
7	6	1342	NO-VEST
7	8	1312	NO-VEST
7	10	1292	NO-VEST
7	12	1342	NO-VEST
7	14	1272	NO-VEST
7	16	1292	NO-VEST
7	18	1282	NO-VEST
7	20	1232	NO-VEST
7	2	1259	ICE-VEST
7	4	1272	ICE-VEST
7	6	1262	ICE-VEST
7	8	1277	ICE-VEST
7	10	1257	ICE-VEST
7	12	1279	ICE-VEST
7	14	1212	ICE-VEST
7	16	1262	ICE-VEST
7	18	1229	ICE-VEST
7	20	1262	ICE-VEST
7	2	1319	MEN-VEST
7	4	1322	MEN-VEST
7	6	1355	MEN-VEST
7	8	1352	MEN-VEST
7	10	1312	MEN-VEST
7	12	1319	MEN-VEST
7	14	1322	MEN-VEST
7	16	1302	MEN-VEST
7	18	1272	MEN-VEST
7	20	1302	MEN-VEST

## Sheet: total distance_performance
	total distance_performance
ID	time	total covered distance (m)	condition
1	20	13450	NO-VEST
1	20	12964	ICE-VEST
1	20	12694	MEN-VEST
2	20	13157	NO-VEST
2	20	14186	ICE-VEST
2	20	13480	MEN-VEST
3	20	13813	NO-VEST
3	20	11592	ICE-VEST
3	20	12904	MEN-VEST
4	20	13480	NO-VEST
4	20	13037	ICE-VEST
4	20	13077	MEN-VEST
5	20	12238	NO-VEST
5	20	12884	ICE-VEST
5	20	13077	MEN-VEST
6	20	13302	NO-VEST
6	20	12576	ICE-VEST
6	20		MEN-VEST
7	20	12987	NO-VEST
7	20	12571	ICE-VEST
7	20	13177	MEN-VEST

## Sheet: heart rate_warm-up
	heart rate_warm-up
ID	time	mean per 2-min block (bpm)	condition
1	2	63.08264463	NO-VEST
1	4	75.15	NO-VEST
1	6	87.04166667	NO-VEST
1	8	89.29166667	NO-VEST
1	10	90.73333333	NO-VEST
1	12	91.925	NO-VEST
1	14	94.13333333	NO-VEST
1	16	97.525	NO-VEST
1	18	99.95	NO-VEST
1	20	102.4583333	NO-VEST
1	22	104.675	NO-VEST
1	24	106.825	NO-VEST
1	26	111.5166667	NO-VEST
1	28	117.625	NO-VEST
1	30	82.31666667	NO-VEST
1	2	81.67768595	ICE-VEST
1	4	76.175	ICE-VEST
1	6	78.21666667	ICE-VEST
1	8	76.24166667	ICE-VEST
1	10	79.91666667	ICE-VEST
1	12	91.65833333	ICE-VEST
1	14	106.25	ICE-VEST
1	16	107.6	ICE-VEST
1	18	110.5333333	ICE-VEST
1	20	109.125	ICE-VEST
1	22	123.8083333	ICE-VEST
1	24	140.0333333	ICE-VEST
1	26	144.975	ICE-VEST
1	28	99.55833333	ICE-VEST
1	30	93.89166667	ICE-VEST
1	2	87.49586777	MEN-VEST
1	4	81.8	MEN-VEST
1	6	82.89166667	MEN-VEST
1	8	81.38333333	MEN-VEST
1	10	78.90833333	MEN-VEST
1	12	128.0666667	MEN-VEST
1	14	155.2916667	MEN-VEST
1	16	155.9333333	MEN-VEST
1	18	160.0416667	MEN-VEST
1	20	164.0166667	MEN-VEST
1	22	166.375	MEN-VEST
1	24	164.4	MEN-VEST
1	26	163.1833333	MEN-VEST
1	28	164.7833333	MEN-VEST
1	30	164.6916667	MEN-VEST
2	2	116.9008264	NO-VEST
2	4	115.7083333	NO-VEST
2	6	116.6583333	NO-VEST
2	8	119.3333333	NO-VEST
2	10	123.525	NO-VEST
2	12	123.0416667	NO-VEST
2	14	126.2916667	NO-VEST
2	16	129.3333333	NO-VEST
2	18	126.3833333	NO-VEST
2	20	138.45	NO-VEST
2	22	149.2416667	NO-VEST
2	24	158.4	NO-VEST
2	26	136.1	NO-VEST
2	28	125.225	NO-VEST
2	30	102.9083333	NO-VEST
2	2	114.2644628	ICE-VEST
2	4	116.0416667	ICE-VEST
2	6	116.5833333	ICE-VEST
2	8	128.5833333	ICE-VEST
2	10	139.0916667	ICE-VEST
2	12	137.875	ICE-VEST
2	14	112.2166667	ICE-VEST
2	16	106.0583333	ICE-VEST
2	18	88.96666667	ICE-VEST
2	20	86.15833333	ICE-VEST
2	22	91.31666667	ICE-VEST
2	24	92.46086957	ICE-VEST
2	26		ICE-VEST
2	28		ICE-VEST
2	30		ICE-VEST
2	2	105.8512397	MEN-VEST
2	4	102.6166667	MEN-VEST
2	6	106.7583333	MEN-VEST
2	8	106.7	MEN-VEST
2	10	105.575	MEN-VEST
2	12	112.0916667	MEN-VEST
2	14	111.15	MEN-VEST
2	16	111.125	MEN-VEST
2	18	110.225	MEN-VEST
2	20	111.7916667	MEN-VEST
2	22	114.4	MEN-VEST
2	24	126.975	MEN-VEST
2	26	134.8583333	MEN-VEST
2	28	107.7333333	MEN-VEST
2	30	103.0333333	MEN-VEST
3	2	65.33884298	NO-VEST
3	4	69.825	NO-VEST
3	6	80.275	NO-VEST
3	8	77.325	NO-VEST
3	10	83.23333333	NO-VEST
3	12	83.175	NO-VEST
3	14	87.68333333	NO-VEST
3	16	99.525	NO-VEST
3	18	102.0583333	NO-VEST
3	20	102.4666667	NO-VEST
3	22	110.025	NO-VEST
3	24	107.9833333	NO-VEST
3	26	115.6166667	NO-VEST
3	28	140.4166667	NO-VEST
3	30	134.7416667	NO-VEST
3	2	68.04958678	ICE-VEST
3	4	63.325	ICE-VEST
3	6	62.55	ICE-VEST
3	8	83.825	ICE-VEST
3	10	82.8	ICE-VEST
3	12	83.425	ICE-VEST
3	14	87.125	ICE-VEST
3	16	89.85833333	ICE-VEST
3	18	106.6916667	ICE-VEST
3	20	112.725	ICE-VEST
3	22	114.0833333	ICE-VEST
3	24	118.8166667	ICE-VEST
3	26	117.9166667	ICE-VEST
3	28	126.125	ICE-VEST
3	30	137.45	ICE-VEST
3	2	87.66115702	MEN-VEST
3	4	80.60833333	MEN-VEST
3	6	69.6	MEN-VEST
3	8	66.81666667	MEN-VEST
3	10	77.71666667	MEN-VEST
3	12	112.4416667	MEN-VEST
3	14	144.3333333	MEN-VEST
3	16	148.525	MEN-VEST
3	18	154.9416667	MEN-VEST
3	20	148.575	MEN-VEST
3	22	146.4916667	MEN-VEST
3	24	144.2	MEN-VEST
3	26	136.55	MEN-VEST
3	28	137.1916667	MEN-VEST
3	30	132.4	MEN-VEST
4	2	105.7355372	NO-VEST
4	4	104.875	NO-VEST
4	6	109.125	NO-VEST
4	8	116.2916667	NO-VEST
4	10	116.2	NO-VEST
4	12	126.2333333	NO-VEST
4	14	137.475	NO-VEST
4	16	144.9583333	NO-VEST
4	18	144.0666667	NO-VEST
4	20	147.55	NO-VEST
4	22	152.25	NO-VEST
4	24	167.15	NO-VEST
4	26	176.5083333	NO-VEST
4	28	157.625	NO-VEST
4	30	141.0083333	NO-VEST
4	2	72.95041322	ICE-VEST
4	4	83.56666667	ICE-VEST
4	6	79.84166667	ICE-VEST
4	8	103.7083333	ICE-VEST
4	10	118.6833333	ICE-VEST
4	12	118.9416667	ICE-VEST
4	14	121.575	ICE-VEST
4	16	121.6916667	ICE-VEST
4	18	129.225	ICE-VEST
4	20	143.2583333	ICE-VEST
4	22	150.0333333	ICE-VEST
4	24	149.6916667	ICE-VEST
4	26	150.5666667	ICE-VEST
4	28	158.0166667	ICE-VEST
4	30	169.2	ICE-VEST
4	2	72.95041322	MEN-VEST
4	4	83.56666667	MEN-VEST
4	6	79.84166667	MEN-VEST
4	8	103.7083333	MEN-VEST
4	10	118.6833333	MEN-VEST
4	12	118.9416667	MEN-VEST
4	14	121.575	MEN-VEST
4	16	121.6916667	MEN-VEST
4	18	129.225	MEN-VEST
4	20	143.2583333	MEN-VEST
4	22	150.0333333	MEN-VEST
4	24	149.6916667	MEN-VEST
4	26	150.5666667	MEN-VEST
4	28	158.0166667	MEN-VEST
4	30	169.2	MEN-VEST
5	2	104.3471074	NO-VEST
5	4	117.15	NO-VEST
5	6	120.475	NO-VEST
5	8	118.8833333	NO-VEST
5	10	121.7	NO-VEST
5	12	136.2333333	NO-VEST
5	14	140.075	NO-VEST
5	16	140.35	NO-VEST
5	18	140.7583333	NO-VEST
5	20	143.9666667	NO-VEST
5	22	151.8083333	NO-VEST
5	24	164.075	NO-VEST
5	26	168.2166667	NO-VEST
5	28	133.3666667	NO-VEST
5	30	124.6513761	NO-VEST
5	2	95.44628099	ICE-VEST
5	4	115.5833333	ICE-VEST
5	6	117.9083333	ICE-VEST
5	8	119.3916667	ICE-VEST
5	10	115.5416667	ICE-VEST
5	12	120.475	ICE-VEST
5	14	129.6833333	ICE-VEST
5	16	130.525	ICE-VEST
5	18	134.8166667	ICE-VEST
5	20	136.1583333	ICE-VEST
5	22	141.9583333	ICE-VEST
5	24	147.3166667	ICE-VEST
5	26	154.5083333	ICE-VEST
5	28	124.8666667	ICE-VEST
5	30	121.6	ICE-VEST
5	2	78.17355372	MEN-VEST
5	4	75.33333333	MEN-VEST
5	6	92.15	MEN-VEST
5	8	97.875	MEN-VEST
5	10	98.95	MEN-VEST
5	12	102.5083333	MEN-VEST
5	14	102.1333333	MEN-VEST
5	16	102.5166667	MEN-VEST
5	18	112.0416667	MEN-VEST
5	20	117.4416667	MEN-VEST
5	22	119.0333333	MEN-VEST
5	24	116.0166667	MEN-VEST
5	26	126.85	MEN-VEST
5	28	141.2083333	MEN-VEST
5	30	147.05	MEN-VEST
6	2	90.1322314	NO-VEST
6	4	96.64166667	NO-VEST
6	6	99.96666667	NO-VEST
6	8	101.025	NO-VEST
6	10	103.7333333	NO-VEST
6	12	101.5583333	NO-VEST
6	14	111.9416667	NO-VEST
6	16	113.7666667	NO-VEST
6	18	117.8083333	NO-VEST
6	20	120.05	NO-VEST
6	22	126.2916667	NO-VEST
6	24	141.2416667	NO-VEST
6	26	154.7	NO-VEST
6	28	119.9666667	NO-VEST
6	30	110.0583333	NO-VEST
6	2	86.03305785	ICE-VEST
6	4	90.40833333	ICE-VEST
6	6	94.58333333	ICE-VEST
6	8	95.44166667	ICE-VEST
6	10	96.96666667	ICE-VEST
6	12	107.3	ICE-VEST
6	14	117.2166667	ICE-VEST
6	16	120.7666667	ICE-VEST
6	18	119.8833333	ICE-VEST
6	20	122.9916667	ICE-VEST
6	22	136.85	ICE-VEST
6	24	151.7583333	ICE-VEST
6	26	153.3833333	ICE-VEST
6	28	114.225	ICE-VEST
6	30	112.125	ICE-VEST
6	2		MEN-VEST
6	4		MEN-VEST
6	6		MEN-VEST
6	8		MEN-VEST
6	10		MEN-VEST
6	12		MEN-VEST
6	14		MEN-VEST
6	16		MEN-VEST
6	18		MEN-VEST
6	20		MEN-VEST
6	22		MEN-VEST
6	24		MEN-VEST
6	26		MEN-VEST
6	28		MEN-VEST
6	30		MEN-VEST
7	2	105.9173554	NO-VEST
7	4	104.875	NO-VEST
7	6	109.175	NO-VEST
7	8	116.3083333	NO-VEST
7	10	116.25	NO-VEST
7	12	126.3583333	NO-VEST
7	14	137.55	NO-VEST
7	16	144.9666667	NO-VEST
7	18	144.0833333	NO-VEST
7	20	147.55	NO-VEST
7	22	152.3583333	NO-VEST
7	24	167.2583333	NO-VEST
7	26	176.4583333	NO-VEST
7	28	157.5	NO-VEST
7	30	140.8333333	NO-VEST
7	2	105.9173554	ICE-VEST
7	4	104.875	ICE-VEST
7	6	109.175	ICE-VEST
7	8	116.3083333	ICE-VEST
7	10	116.25	ICE-VEST
7	12	126.3583333	ICE-VEST
7	14	137.55	ICE-VEST
7	16	144.9666667	ICE-VEST
7	18	144.0833333	ICE-VEST
7	20	147.55	ICE-VEST
7	22	152.3583333	ICE-VEST
7	24	167.2583333	ICE-VEST
7	26	176.4583333	ICE-VEST
7	28	157.5	ICE-VEST
7	30	140.8333333	ICE-VEST
7	2	65.33884298	MEN-VEST
7	4	69.825	MEN-VEST
7	6	80.275	MEN-VEST
7	8	77.325	MEN-VEST
7	10	83.23333333	MEN-VEST
7	12	83.175	MEN-VEST
7	14	87.68333333	MEN-VEST
7	16	99.525	MEN-VEST
7	18	102.0583333	MEN-VEST
7	20	102.4666667	MEN-VEST
7	22	110.025	MEN-VEST
7	24	107.9833333	MEN-VEST
7	26	115.6166667	MEN-VEST
7	28	140.4166667	MEN-VEST
7	30	134.7416667	MEN-VEST

## Sheet: heart rate_performance
	heart rate_performance
ID	time	mean per 2-min block (bpm)	condition
1	2	139.42975	NO-VEST
1	4	155.175	NO-VEST
1	6	158.55833	NO-VEST
1	8	159.01667	NO-VEST
1	10	161.975	NO-VEST
1	12	163.075	NO-VEST
1	14	164.075	NO-VEST
1	16	166.06667	NO-VEST
1	18	172.475	NO-VEST
1	20	176.84167	NO-VEST
1	2	148.64463	ICE-VEST
1	4	162.41667	ICE-VEST
1	6	165.75833	ICE-VEST
1	8	170.25	ICE-VEST
1	10	172.06667	ICE-VEST
1	12	177.29167	ICE-VEST
1	14	176.25833	ICE-VEST
1	16	176.76667	ICE-VEST
1	18	175.1	ICE-VEST
1	20	174.14167	ICE-VEST
1	2	148.39669	MEN-VEST
1	4	155.75	MEN-VEST
1	6	156.775	MEN-VEST
1	8	161.75833	MEN-VEST
1	10	164.225	MEN-VEST
1	12	166.875	MEN-VEST
1	14	162.56667	MEN-VEST
1	16	164.48333	MEN-VEST
1	18	164.975	MEN-VEST
1	20	164	MEN-VEST
2	2	161.56198	NO-VEST
2	4	174.15	NO-VEST
2	6	174.78333	NO-VEST
2	8	175.875	NO-VEST
2	10	172.29167	NO-VEST
2	12	171.4	NO-VEST
2	14	173.05833	NO-VEST
2	16	172.70833	NO-VEST
2	18	179.06667	NO-VEST
2	20	179.9	NO-VEST
2	2	140.10744	ICE-VEST
2	4	155.60833	ICE-VEST
2	6	161.9	ICE-VEST
2	8	166.55833	ICE-VEST
2	10	169.45833	ICE-VEST
2	12	170.49167	ICE-VEST
2	14	169.21667	ICE-VEST
2	16	170.05	ICE-VEST
2	18	174.7	ICE-VEST
2	20	175.53333	ICE-VEST
2	2	145.52066	MEN-VEST
2	4	161.44167	MEN-VEST
2	6	166.26667	MEN-VEST
2	8	167.44167	MEN-VEST
2	10	167.975	MEN-VEST
2	12	166.31667	MEN-VEST
2	14	166.15	MEN-VEST
2	16	166.775	MEN-VEST
2	18	169.15833	MEN-VEST
2	20	170.10833	MEN-VEST
3	2	159.94215	NO-VEST
3	4	172.625	NO-VEST
3	6	172.775	NO-VEST
3	8	174.78333	NO-VEST
3	10	179.55833	NO-VEST
3	12	181.95	NO-VEST
3	14	179.25	NO-VEST
3	16	178.15833	NO-VEST
3	18	177.20833	NO-VEST
3	20	177.95	NO-VEST
3	2	141.99174	ICE-VEST
3	4	160.94167	ICE-VEST
3	6	162.875	ICE-VEST
3	8	163.19167	ICE-VEST
3	10	166.13333	ICE-VEST
3	12	165.25	ICE-VEST
3	14	165.05	ICE-VEST
3	16	167.38333	ICE-VEST
3	18	174.58333	ICE-VEST
3	20	177.15	ICE-VEST
3	2	137.72727	MEN-VEST
3	4	144.34167	MEN-VEST
3	6	151.6	MEN-VEST
3	8	154.53333	MEN-VEST
3	10	146.08333	MEN-VEST
3	12	148.03333	MEN-VEST
3	14	139.125	MEN-VEST
3	16	138.775	MEN-VEST
3	18	134.30833	MEN-VEST
3	20	133.15833	MEN-VEST
4	2	140.13223	NO-VEST
4	4	171.21667	NO-VEST
4	6	170.10833	NO-VEST
4	8	168.90833	NO-VEST
4	10	168.43333	NO-VEST
4	12	167.775	NO-VEST
4	14	168.15	NO-VEST
4	16	167.80833	NO-VEST
4	18	169.78333	NO-VEST
4	20	171.36667	NO-VEST
4	2	165.30579	ICE-VEST
4	4	168.85833	ICE-VEST
4	6	163.16667	ICE-VEST
4	8	158.16667	ICE-VEST
4	10	156.68333	ICE-VEST
4	12	160.49167	ICE-VEST
4	14	161.08333	ICE-VEST
4	16	163.15	ICE-VEST
4	18	163.69167	ICE-VEST
4	20	162.70833	ICE-VEST
4	2	165.30579	MEN-VEST
4	4	168.85833	MEN-VEST
4	6	163.16667	MEN-VEST
4	8	158.16667	MEN-VEST
4	10	156.68333	MEN-VEST
4	12	160.49167	MEN-VEST
4	14	161.08333	MEN-VEST
4	16	163.15	MEN-VEST
4	18	163.69167	MEN-VEST
4	20	162.70833	MEN-VEST
5	2	172.89256	NO-VEST
5	4	174.85	NO-VEST
5	6	174.06667	NO-VEST
5	8	176.40833	NO-VEST
5	10	177.18333	NO-VEST
5	12	174.09167	NO-VEST
5	14	174.275	NO-VEST
5	16	176.575	NO-VEST
5	18	181.13333	NO-VEST
5	20	179.70833	NO-VEST
5	2	113.7438	ICE-VEST
5	4	164.7	ICE-VEST
5	6	163.01667	ICE-VEST
5	8	164.925	ICE-VEST
5	10	162.89167	ICE-VEST
5	12	163.64167	ICE-VEST
5	14	167.3	ICE-VEST
5	16	172.6	ICE-VEST
5	18	173.775	ICE-VEST
5	20	174.65833	ICE-VEST
5	2	159.95041	MEN-VEST
5	4	173.73333	MEN-VEST
5	6	174.05833	MEN-VEST
5	8	177.84167	MEN-VEST
5	10	177.80833	MEN-VEST
5	12	178.30833	MEN-VEST
5	14	178.76667	MEN-VEST
5	16	177.93333	MEN-VEST
5	18	178.75	MEN-VEST
5	20	184.16667	MEN-VEST
6	2	126.73554	NO-VEST
6	4	140.24167	NO-VEST
6	6	145.43333	NO-VEST
6	8	147.825	NO-VEST
6	10	145.34167	NO-VEST
6	12	145.15833	NO-VEST
6	14	144.78333	NO-VEST
6	16	148.05	NO-VEST
6	18	149.68333	NO-VEST
6	20	151.68333	NO-VEST
6	2	149.80992	ICE-VEST
6	4	159.8	ICE-VEST
6	6	162.275	ICE-VEST
6	8	164.2	ICE-VEST
6	10	164.775	ICE-VEST
6	12	163.725	ICE-VEST
6	14	163.33333	ICE-VEST
6	16	161.425	ICE-VEST
6	18	161.71667	ICE-VEST
6	20	162.175	ICE-VEST
6	2		MEN-VEST
6	4		MEN-VEST
6	6		MEN-VEST
6	8		MEN-VEST
6	10		MEN-VEST
6	12		MEN-VEST
6	14		MEN-VEST
6	16		MEN-VEST
6	18		MEN-VEST
6	20		MEN-VEST
7	2	156.64463	NO-VEST
7	4	171.56667	NO-VEST
7	6	169.35833	NO-VEST
7	8	168.76667	NO-VEST
7	10	168.175	NO-VEST
7	12	167.95	NO-VEST
7	14	168.13333	NO-VEST
7	16	168.06667	NO-VEST
7	18	170.35	NO-VEST
7	20	172.39167	NO-VEST
7	2	152.30579	ICE-VEST
7	4	171.525	ICE-VEST
7	6	169.55	ICE-VEST
7	8	168.875	ICE-VEST
7	10	168.26667	ICE-VEST
7	12	167.85833	ICE-VEST
7	14	168.10833	ICE-VEST
7	16	167.86667	ICE-VEST
7	18	170.2	ICE-VEST
7	20	172.14167	ICE-VEST
7	2	157.64463	MEN-VEST
7	4	172.575	MEN-VEST
7	6	172.76667	MEN-VEST
7	8	174.68333	MEN-VEST
7	10	179.46667	MEN-VEST
7	12	181.86667	MEN-VEST
7	14	179.38333	MEN-VEST
7	16	178.21667	MEN-VEST
7	18	177.225	MEN-VEST
7	20	177.89167	MEN-VEST

## Sheet: thermal sensation_warm-up
	thermal sensation_warm-up
ID	time	thermal sensation (score)	condition
1	0	4	NO-VEST
1	5	4	NO-VEST
1	10	4	NO-VEST
1	15	4	NO-VEST
1	20	4	NO-VEST
1	25	5	NO-VEST
1	30	4	NO-VEST
1	0	4	ICE-VEST
1	5	4	ICE-VEST
1	10	4	ICE-VEST
1	15	4	ICE-VEST
1	20	5	ICE-VEST
1	25	5	ICE-VEST
1	30	4	ICE-VEST
1	0	4	MEN-VEST
1	5	4	MEN-VEST
1	10	4	MEN-VEST
1	15	4	MEN-VEST
1	20	5	MEN-VEST
1	25	5	MEN-VEST
1	30	4	MEN-VEST
2	0	4	NO-VEST
2	5	4	NO-VEST
2	10	4	NO-VEST
2	15	5	NO-VEST
2	20	5	NO-VEST
2	25	6	NO-VEST
2	30	4	NO-VEST
2	0	3	ICE-VEST
2	5	4	ICE-VEST
2	10	5	ICE-VEST
2	15	4	ICE-VEST
2	20	5	ICE-VEST
2	25	5	ICE-VEST
2	30	4	ICE-VEST
2	0	3	MEN-VEST
2	5	4	MEN-VEST
2	10	4	MEN-VEST
2	15	5	MEN-VEST
2	20	5	MEN-VEST
2	25	6	MEN-VEST
2	30	5	MEN-VEST
3	0	4	NO-VEST
3	5	3	NO-VEST
3	10	4	NO-VEST
3	15	5	NO-VEST
3	20	5	NO-VEST
3	25	6	NO-VEST
3	30	4	NO-VEST
3	0	3	ICE-VEST
3	5	2	ICE-VEST
3	10	3	ICE-VEST
3	15	3	ICE-VEST
3	20	5	ICE-VEST
3	25	5	ICE-VEST
3	30	3	ICE-VEST
3	0	3	MEN-VEST
3	5	4	MEN-VEST
3	10	4	MEN-VEST
3	15	4	MEN-VEST
3	20	6	MEN-VEST
3	25	6	MEN-VEST
3	30	3	MEN-VEST
4	0	5	NO-VEST
4	5	5	NO-VEST
4	10	4	NO-VEST
4	15	4	NO-VEST
4	20	4	NO-VEST
4	25	4	NO-VEST
4	30	4	NO-VEST
4	0	5	ICE-VEST
4	5	5	ICE-VEST
4	10	5	ICE-VEST
4	15	5	ICE-VEST
4	20	4	ICE-VEST
4	25	6	ICE-VEST
4	30	4	ICE-VEST
4	0	5	MEN-VEST
4	5	5	MEN-VEST
4	10	5	MEN-VEST
4	15	5	MEN-VEST
4	20	4	MEN-VEST
4	25	4	MEN-VEST
4	30	4	MEN-VEST
5	0	3	NO-VEST
5	5	4	NO-VEST
5	10	4	NO-VEST
5	15	5	NO-VEST
5	20	4	NO-VEST
5	25	4	NO-VEST
5	30	3	NO-VEST
5	0	4	ICE-VEST
5	5	4	ICE-VEST
5	10	5	ICE-VEST
5	15	4	ICE-VEST
5	20	5	ICE-VEST
5	25	5	ICE-VEST
5	30	4	ICE-VEST
5	0	2	MEN-VEST
5	5	3	MEN-VEST
5	10	4	MEN-VEST
5	15	5	MEN-VEST
5	20	5	MEN-VEST
5	25	6	MEN-VEST
5	30	5	MEN-VEST
6	0	4	NO-VEST
6	5	4	NO-VEST
6	10	4	NO-VEST
6	15	5	NO-VEST
6	20	5	NO-VEST
6	25	5	NO-VEST
6	30	4	NO-VEST
6	0	2	ICE-VEST
6	5	4	ICE-VEST
6	10	2	ICE-VEST
6	15	4	ICE-VEST
6	20	4	ICE-VEST
6	25	6	ICE-VEST
6	30	4	ICE-VEST
6	0		MEN-VEST
6	5		MEN-VEST
6	10		MEN-VEST
6	15		MEN-VEST
6	20		MEN-VEST
6	25		MEN-VEST
6	30		MEN-VEST
7	0	4	NO-VEST
7	5	5	NO-VEST
7	10	6	NO-VEST
7	15	6	NO-VEST
7	20	6	NO-VEST
7	25	7	NO-VEST
7	30	6	NO-VEST
7	0	3	ICE-VEST
7	5	4	ICE-VEST
7	10	5	ICE-VEST
7	15	5	ICE-VEST
7	20	6	ICE-VEST
7	25	6	ICE-VEST
7	30	5	ICE-VEST
7	0	3	MEN-VEST
7	5	4	MEN-VEST
7	10	3	MEN-VEST
7	15	5	MEN-VEST
7	20	5	MEN-VEST
7	25	6	MEN-VEST
7	30	5	MEN-VEST

## Sheet: thermal comfort_warm-up
	thermal comfort_warm-up
ID	time	thermal comfort (score)	condition
1	0	3	NO-VEST
1	5	3	NO-VEST
1	10	3	NO-VEST
1	15	4	NO-VEST
1	20	4	NO-VEST
1	25	4	NO-VEST
1	30	3	NO-VEST
1	0	3	ICE-VEST
1	5	3	ICE-VEST
1	10	3	ICE-VEST
1	15	3	ICE-VEST
1	20	2	ICE-VEST
1	25	2	ICE-VEST
1	30	3	ICE-VEST
1	0	3	MEN-VEST
1	5	3	MEN-VEST
1	10	3	MEN-VEST
1	15	3	MEN-VEST
1	20	2	MEN-VEST
1	25	2	MEN-VEST
1	30	3	MEN-VEST
2	0	3	NO-VEST
2	5	3	NO-VEST
2	10	3	NO-VEST
2	15	3	NO-VEST
2	20	3	NO-VEST
2	25	2	NO-VEST
2	30	3	NO-VEST
2	0	4	ICE-VEST
2	5	3	ICE-VEST
2	10	2	ICE-VEST
2	15	3	ICE-VEST
2	20	2	ICE-VEST
2	25	2	ICE-VEST
2	30	3	ICE-VEST
2	0	4	MEN-VEST
2	5	3	MEN-VEST
2	10	3	MEN-VEST
2	15	3	MEN-VEST
2	20	2	MEN-VEST
2	25	2	MEN-VEST
2	30	2	MEN-VEST
3	0	1	NO-VEST
3	5	1	NO-VEST
3	10	2	NO-VEST
3	15	2	NO-VEST
3	20	3	NO-VEST
3	25	3	NO-VEST
3	30	1	NO-VEST
3	0	1	ICE-VEST
3	5	1	ICE-VEST
3	10	1	ICE-VEST
3	15	2	ICE-VEST
3	20	3	ICE-VEST
3	25	3	ICE-VEST
3	30	2	ICE-VEST
3	0	2	MEN-VEST
3	5	1	MEN-VEST
3	10	1	MEN-VEST
3	15	4	MEN-VEST
3	20	4	MEN-VEST
3	25	4	MEN-VEST
3	30	2	MEN-VEST
4	0	3	NO-VEST
4	5	2	NO-VEST
4	10	3	NO-VEST
4	15	2	NO-VEST
4	20	2	NO-VEST
4	25	2	NO-VEST
4	30	1	NO-VEST
4	0	3	ICE-VEST
4	5	3	ICE-VEST
4	10	3	ICE-VEST
4	15	2	ICE-VEST
4	20	2	ICE-VEST
4	25	3	ICE-VEST
4	30	1	ICE-VEST
4	0	1	MEN-VEST
4	5	3	MEN-VEST
4	10	3	MEN-VEST
4	15	2	MEN-VEST
4	20	1	MEN-VEST
4	25	1	MEN-VEST
4	30	1	MEN-VEST
5	0	1	NO-VEST
5	5	1	NO-VEST
5	10	1	NO-VEST
5	15	2	NO-VEST
5	20	2	NO-VEST
5	25	2	NO-VEST
5	30	1	NO-VEST
5	0	1	ICE-VEST
5	5	2	ICE-VEST
5	10	2	ICE-VEST
5	15	2	ICE-VEST
5	20	2	ICE-VEST
5	25	1	ICE-VEST
5	30	1	ICE-VEST
5	0	1	MEN-VEST
5	5	1	MEN-VEST
5	10	2	MEN-VEST
5	15	2	MEN-VEST
5	20	3	MEN-VEST
5	25	3	MEN-VEST
5	30	3	MEN-VEST
6	0	4	NO-VEST
6	5	4	NO-VEST
6	10	4	NO-VEST
6	15	4	NO-VEST
6	20	4	NO-VEST
6	25	4	NO-VEST
6	30	4	NO-VEST
6	0	4	ICE-VEST
6	5	3	ICE-VEST
6	10	4	ICE-VEST
6	15	3	ICE-VEST
6	20	3	ICE-VEST
6	25	4	ICE-VEST
6	30	3	ICE-VEST
6	0		MEN-VEST
6	5		MEN-VEST
6	10		MEN-VEST
6	15		MEN-VEST
6	20		MEN-VEST
6	25		MEN-VEST
6	30		MEN-VEST
7	0	1	NO-VEST
7	5	4	NO-VEST
7	10	4	NO-VEST
7	15	4	NO-VEST
7	20	4	NO-VEST
7	25	4	NO-VEST
7	30	4	NO-VEST
7	0	1	ICE-VEST
7	5	3	ICE-VEST
7	10	4	ICE-VEST
7	15	4	ICE-VEST
7	20	4	ICE-VEST
7	25	4	ICE-VEST
7	30	3	ICE-VEST
7	0	1	MEN-VEST
7	5	2	MEN-VEST
7	10	3	MEN-VEST
7	15	2	MEN-VEST
7	20	2	MEN-VEST
7	25	3	MEN-VEST
7	30	4	MEN-VEST

## Sheet: thermal sensation_performance
	thermal sensation_performance
ID	time	thermal sensation (score)	condition
1	0	5	NO-VEST
1	20	6	NO-VEST
1	0	4	ICE-VEST
1	20	6	ICE-VEST
1	0	4	MEN-VEST
1	20	6	MEN-VEST
2	0	4	NO-VEST
2	20	6	NO-VEST
2	0	4	ICE-VEST
2	20	7	ICE-VEST
2	0	4	MEN-VEST
2	20	7	MEN-VEST
3	0	4	NO-VEST
3	20	6	NO-VEST
3	0	3	ICE-VEST
3	20	6	ICE-VEST
3	0	3	MEN-VEST
3	20	6	MEN-VEST
4	0	4	NO-VEST
4	20	5	NO-VEST
4	0	6	ICE-VEST
4	20	4	ICE-VEST
4	0	7	MEN-VEST
4	20	6	MEN-VEST
5	0	6	NO-VEST
5	20	6	NO-VEST
5	0	4	ICE-VEST
5	20	6	ICE-VEST
5	0	4	MEN-VEST
5	20	6	MEN-VEST
6	0	3	NO-VEST
6	20	7	NO-VEST
6	0	4	ICE-VEST
6	20	6	ICE-VEST
6	0		MEN-VEST
6	20		MEN-VEST
7	0	6	NO-VEST
7	20	6	NO-VEST
7	0	4	ICE-VEST
7	20	5	ICE-VEST
7	0	6	MEN-VEST
7	20	6	MEN-VEST

## Sheet: thermal comfort_performance
	thermal comfort_performance
ID	time	thermal comfort (score)	condition
1	0	4	NO-VEST
1	20	4	NO-VEST
1	0	3	ICE-VEST
1	20	1	ICE-VEST
1	0	3	MEN-VEST
1	20	3	MEN-VEST
2	0	3	NO-VEST
2	20	4	NO-VEST
2	0	3	ICE-VEST
2	20	1	ICE-VEST
2	0	3	MEN-VEST
2	20	1	MEN-VEST
3	0	1	NO-VEST
3	20	4	NO-VEST
3	0	1	ICE-VEST
3	20	1	ICE-VEST
3	0	1	MEN-VEST
3	20	4	MEN-VEST
4	0	1	NO-VEST
4	20	1	NO-VEST
4	0	4	ICE-VEST
4	20	1	ICE-VEST
4	0	4	MEN-VEST
4	20	3	MEN-VEST
5	0	2	NO-VEST
5	20	2	NO-VEST
5	0	2	ICE-VEST
5	20	3	ICE-VEST
5	0	2	MEN-VEST
5	20	1	MEN-VEST
6	0	4	NO-VEST
6	20	4	NO-VEST
6	0	3	ICE-VEST
6	20	4	ICE-VEST
6	0		MEN-VEST
6	20		MEN-VEST
7	0	4	NO-VEST
7	20	4	NO-VEST
7	0	2	ICE-VEST
7	20	4	ICE-VEST
7	0	4	MEN-VEST
7	20	4	MEN-VEST

## Sheet: perception of exertion_warm-up
	perception of exertion_warm-up
ID	time	RPE (score)	condition
1	5	8	NO-VEST
1	10	8	NO-VEST
1	15	9	NO-VEST
1	20	10	NO-VEST
1	25	11	NO-VEST
1	30	8	NO-VEST
1	5	7	ICE-VEST
1	10	8	ICE-VEST
1	15	10	ICE-VEST
1	20	12	ICE-VEST
1	25	14	ICE-VEST
1	30	9	ICE-VEST
1	5	7	MEN-VEST
1	10	8	MEN-VEST
1	15	11	MEN-VEST
1	20	13	MEN-VEST
1	25	14	MEN-VEST
1	30	8	MEN-VEST
2	5	9	NO-VEST
2	10	11	NO-VEST
2	15	14	NO-VEST
2	20	14	NO-VEST
2	25	17	NO-VEST
2	30	14	NO-VEST
2	5	10	ICE-VEST
2	10	11	ICE-VEST
2	15	13	ICE-VEST
2	20	14	ICE-VEST
2	25	18	ICE-VEST
2	30	13	ICE-VEST
2	5	9	MEN-VEST
2	10	9	MEN-VEST
2	15	12	MEN-VEST
2	20	13	MEN-VEST
2	25	17	MEN-VEST
2	30	13	MEN-VEST
3	5	6	NO-VEST
3	10	8	NO-VEST
3	15	11	NO-VEST
3	20	12	NO-VEST
3	25	14	NO-VEST
3	30	7	NO-VEST
3	5	6	ICE-VEST
3	10	8	ICE-VEST
3	15	12	ICE-VEST
3	20	13	ICE-VEST
3	25	15	ICE-VEST
3	30	9	ICE-VEST
3	5	8	MEN-VEST
3	10	8	MEN-VEST
3	15	13	MEN-VEST
3	20	15	MEN-VEST
3	25	17	MEN-VEST
3	30	9	MEN-VEST
4	5	9	NO-VEST
4	10	11	NO-VEST
4	15	13	NO-VEST
4	20	13	NO-VEST
4	25	18	NO-VEST
4	30	9	NO-VEST
4	5	10	ICE-VEST
4	10	12	ICE-VEST
4	15	14	ICE-VEST
4	20	14	ICE-VEST
4	25	18	ICE-VEST
4	30	7	ICE-VEST
4	5	11	MEN-VEST
4	10	11	MEN-VEST
4	15	13	MEN-VEST
4	20	15	MEN-VEST
4	25	19	MEN-VEST
4	30	9	MEN-VEST
5	5	6	NO-VEST
5	10	8	NO-VEST
5	15	12	NO-VEST
5	20	14	NO-VEST
5	25	17	NO-VEST
5	30	9	NO-VEST
5	5	8	ICE-VEST
5	10	9	ICE-VEST
5	15	13	ICE-VEST
5	20	13	ICE-VEST
5	25	15	ICE-VEST
5	30	7	ICE-VEST
5	5	8	MEN-VEST
5	10	9	MEN-VEST
5	15	13	MEN-VEST
5	20	14	MEN-VEST
5	25	17	MEN-VEST
5	30	11	MEN-VEST
6	5	8	NO-VEST
6	10	9	NO-VEST
6	15	12	NO-VEST
6	20	14	NO-VEST
6	25	17	NO-VEST
6	30	9	NO-VEST
6	5	9	ICE-VEST
6	10	9	ICE-VEST
6	15	13	ICE-VEST
6	20	15	ICE-VEST
6	25	17	ICE-VEST
6	30	7	ICE-VEST
6	5		MEN-VEST
6	10		MEN-VEST
6	15		MEN-VEST
6	20		MEN-VEST
6	25		MEN-VEST
6	30		MEN-VEST
7	5	11	NO-VEST
7	10	13	NO-VEST
7	15	13	NO-VEST
7	20	17	NO-VEST
7	25	20	NO-VEST
7	30	13	NO-VEST
7	5	11	ICE-VEST
7	10	13	ICE-VEST
7	15	15	ICE-VEST
7	20	16	ICE-VEST
7	25	19	ICE-VEST
7	30	10	ICE-VEST
7	5	11	MEN-VEST
7	10	14	MEN-VEST
7	15	15	MEN-VEST
7	20	15	MEN-VEST
7	25	18	MEN-VEST
7	30	11	MEN-VEST

## Sheet: perception of exertion_perf
	perception of exertion_performance
ID	time	RPE (score)	condition
1	20	17	NO-VEST
1	20	17	ICE-VEST
1	20	15	MEN-VEST
2	20	18	NO-VEST
2	20	19	ICE-VEST
2	20	19	MEN-VEST
3	20	17	NO-VEST
3	20	17	ICE-VEST
3	20	18	MEN-VEST
4	20	18	NO-VEST
4	20	17	ICE-VEST
4	20	19	MEN-VEST
5	20	18	NO-VEST
5	20	19	ICE-VEST
5	20	18	MEN-VEST
6	20	18	NO-VEST
6	20	18	ICE-VEST
6	20		MEN-VEST
7	20	18	NO-VEST
7	20	18	ICE-VEST
7	20	19	MEN-VEST

[truncated: 2 more sheets: cooling rate_warm-up, cooling rate_performance]
